# Supplementary material
Source: Springer Nature journal article supplement (https://www.springermedizin.de/resource/supplementary/13049_2013_706_MOESM2_ESM.pdf/9666940)
Supplement: MOESM2 [file 9666940]

## Additional file 2

Rognås et al., "Refraining from pre-hospital advanced airway management:  
a prospective observational study from an anaesthesiologist-staffed pre-hospital critical care  
service."

### Demographic data

|                                       | Numbers | %           |
|---------------------------------------|---------|-------------|
| Total number of patients included (N) | 347     |             |
| Males                                 | 211     | 60.8        |
| ASA-PS*-score mean                    | 2.20    | 1-4 (range) |
| Pre-existing cardiac disease          | 75      | 21.7        |
| Pre-existing hypertension             | 22      | 6.4         |
| Pre-existing COPD**                   | 51      | 14.7        |
| Pre-existing diabetes                 | 21      | 6.1         |
| Pre-existing neurological disease     | 44      | 12.7        |
| Other pre-existing disease            | 99      | 28.6        |

\*American Society of Anesthesiologists Physical Status

\*\* Chronic Obstructive Pulmonary Disease.

### Patients characteristics (N=347)

| Patient category                            | Number | %    |
|---------------------------------------------|--------|------|
| Isolated traumatic brain injury             | 5      | 1.4  |
| Multitrauma (blunt)                         | 4      | 1.2  |
| Strangulation /suffocation                  | 3      | 0.9  |
| Burns                                       | 2      | 0.6  |
| Other blunt trauma                          | 2      | 0.6  |
| Blunt trauma, total                         | 16     | 4.5  |
| Penetrating trauma                          | 1      | 0.3  |
| Trauma, total                               | 17     | 4.9  |
|                                             |        |      |
| Cardiac arrest                              | 203    | 58.5 |
| Cardiac (excluding cardiac arrest)          | 21     | 6.1  |
| Asthma / COPD*                              | 25     | 7.2  |
| Stroke / subarachnoid hemorrhage            | 34     | 9.8  |
| Oto- rhino- laryngology                     | 1      | 0.3  |
| Other patient categories                    | 74     | 21.3 |
|                                             |        |      |
| First respiratory rate below 8              | 198    | 57.1 |
| First respiratory rate over 30              | 19     | 5.5  |
| First oxygen saturation below 90%           | 325 ** | 93.6 |
| First heart rate below 40                   | 190    | 54.8 |
| First heart rate over 180                   | 3      | 0.9  |
| First systolic blood pressure below 90 mmHg | 200    | 57.6 |
| First GCS*** 3-8                            | 274    | 80.0 |
| First GCS 9-13                              | 23     | 6.6  |
| First GCS 14-15                             | 43**** | 12.4 |

\*Chronic Obstructive Pulmonary Disease

\*\*115 with supplementary oxygen

\*\*\*Glasgow Coma Scale score

\*\*\*\* GCS data is missing on 7 patients
